# Supplementary material for: E2F4 regulatory program predicts patient survival prognosis in breast cancer
Source: Springer Nature journal article supplement (doi:10.1186/s13058-014-0486-7), 2014-12-01

**E2F4 activity, all subtypes  
n=1902**

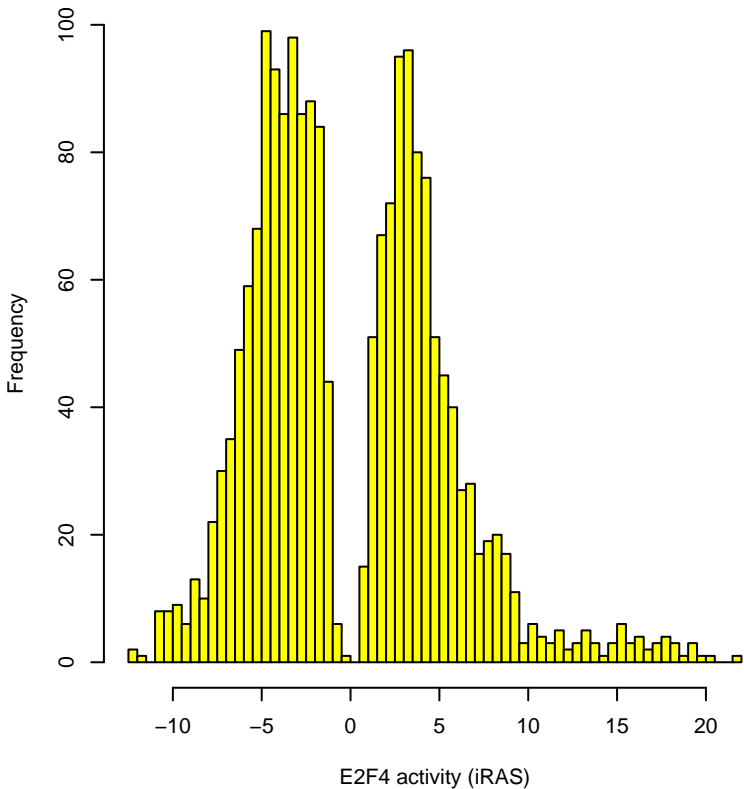

**E2F4 activity, ER Positive only  
n=1485**

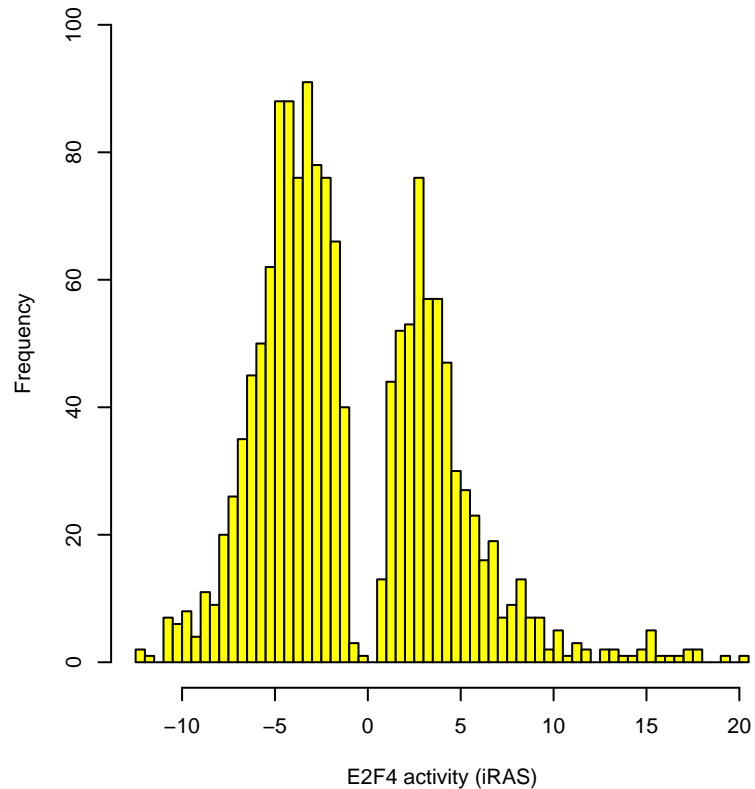

**E2F4 activity, ER Negative only  
n=393**

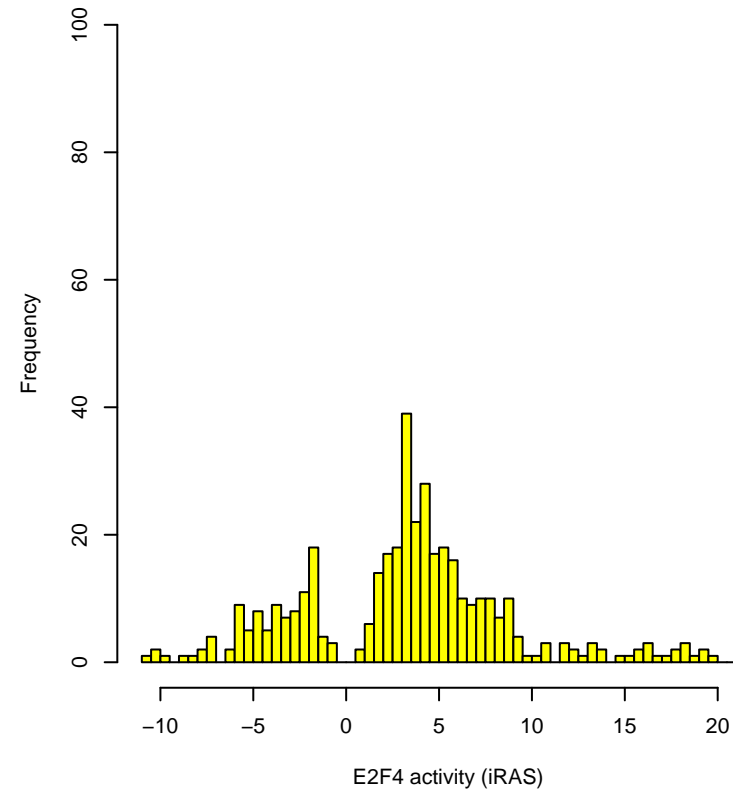

Supplement: MOESM3 [file 9781268]
