# Supplementary material for: E2F4 regulatory program predicts patient survival prognosis in breast cancer
Source: Springer Nature journal article supplement (doi:10.1186/s13058-014-0486-7), 2014-12-01

**oncoType DX (All samples)**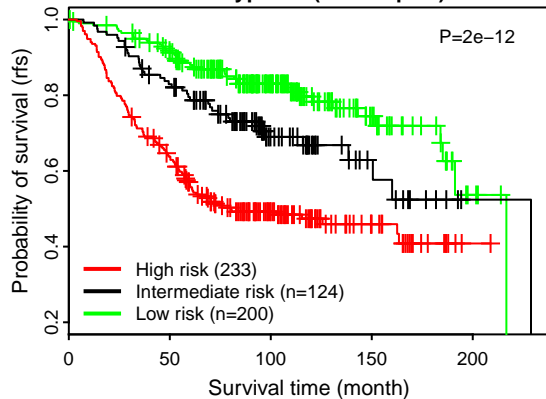**E2F4 signature (All samples)**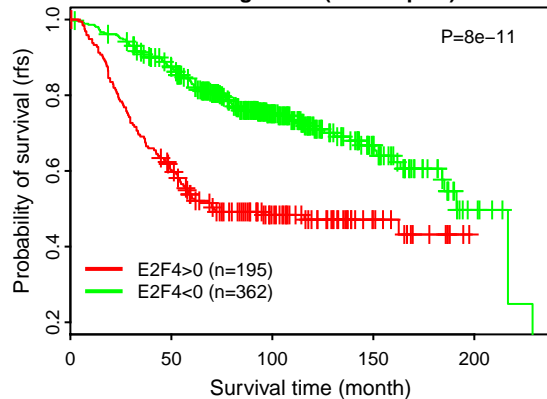**E2F4 signature (Intermediate risk group)**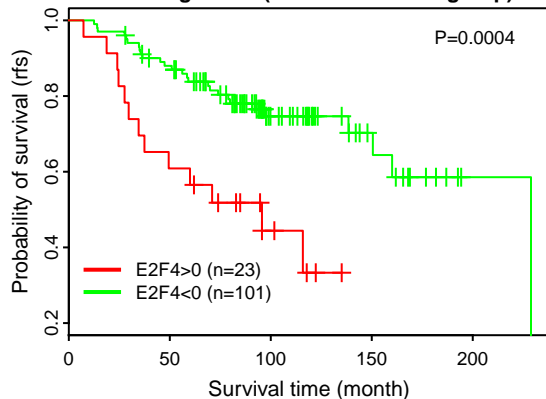**oncoType DX score (Intermediate risk group)**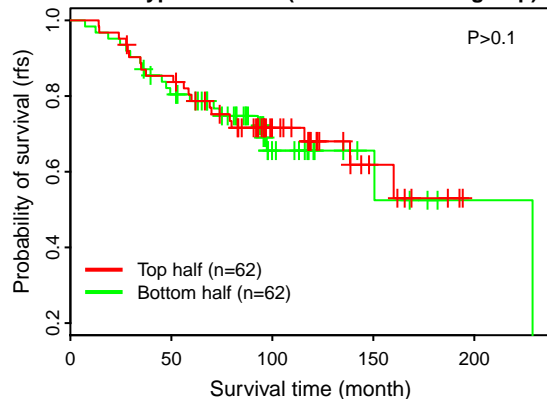

Supplement: MOESM4 [file 9781268]
